# Supplementary material for: Single-cell transcriptomics defines an improved, validated monoculture protocol for differentiation of human iPSC to microglia
Source: Springer Nature journal article supplement (doi:10.1038/s41598-022-23477-2), 2022-11-14

## **SUPPLEMENTARY FIGURES**

**Supplementary figure 1: Development of the pmChGIP SH-SY5Y cell line for measuring autophagy.** **A)** The pmChGIP construct was generated by PCR amplification of mCherry-eGFP fusion from the pBABE-puro-mCherry-eGFP-LC3B vector with SpeI and BamHI restriction sites. These were cloned into a lentiviral backbone EF1 $\alpha$  IRES Puro to generate the pmChGIP vector. **B)** Plasmid map of pmChGIP, **C)** HEK293T were transfected with pmChGIP (dual mCherry eGFP vector, pmCherry (single mCherry vector), or pGIP (single eGFP vector) to confirm dual expression. Images taken at 48hr post transfection using EVOS Floid at 20x magnification. Scale bar 100 $\mu$ m. Cont are untransfected HEK293T cells. **D)** SH-SY5Y at 48hr following transduction with pmChGIP lentivirus confirms successful integration and signal. Images taken using EVOS Floid at 20x magnification. Scale bar 100 $\mu$ m. Cont are untransduced SH-SY5Y. **E)** Clonal pmChGIP SH-SY5Y cell lines were generated by transduction of pmChGIP at 1:32 or 1:2 dilution of lentivirus (corresponding to MOI of 0.3 and 2 respectively) into p10 SH-SY5Y. After 24hr single cell sorting was undertaken for double positive cells. Sorted cells were expanded over several weeks before banking. Fluorescence of the four 1:32 pmChGIP SH-SY5Y lines and two 1:2 pmChGIP SH-SY5Y lines were quantified using FACS. Cells were either live or fixed, to mimic the phagocytosis assay conditions. Fixing reduced the fluorescent intensity of all lines as expected. Line pmChGIP 1:2 F4 showed the highest geometric mean intensities and was used for phagocytosis assays. **F)** Example FACS plots showing clear separation of control SH-SY5Y and the pmChGIP 1:2 F4 SH-SY5Y cell line. 488 signal on the X-axis and 561 signal on the Y-axis.

**A**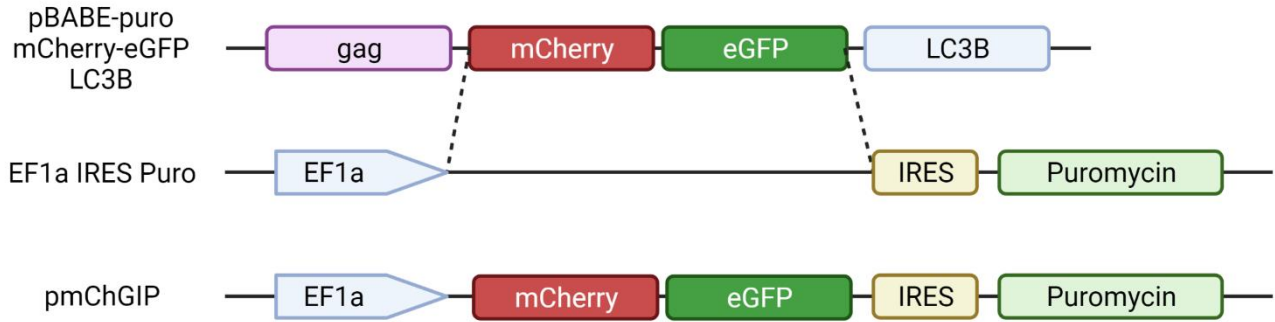**B**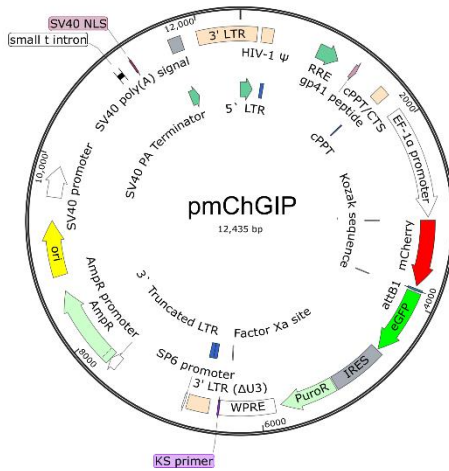**C**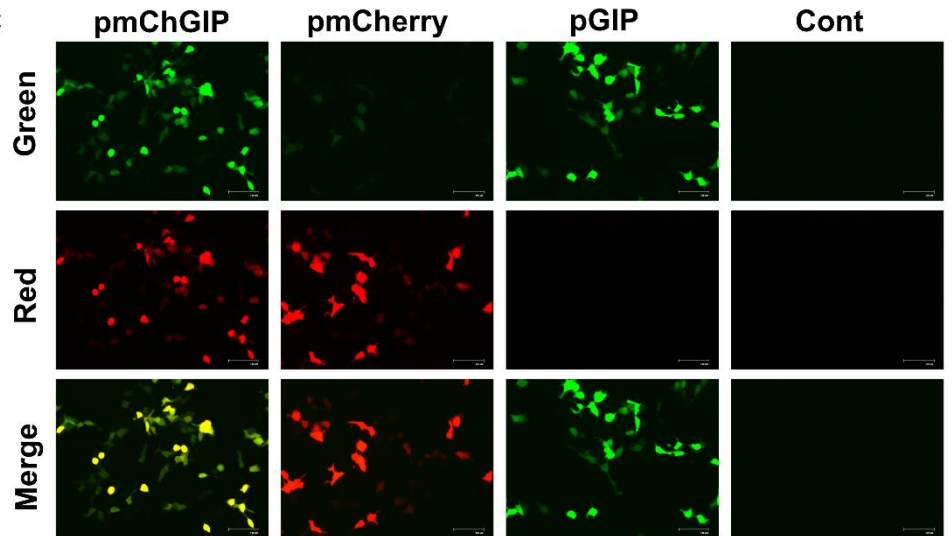**D**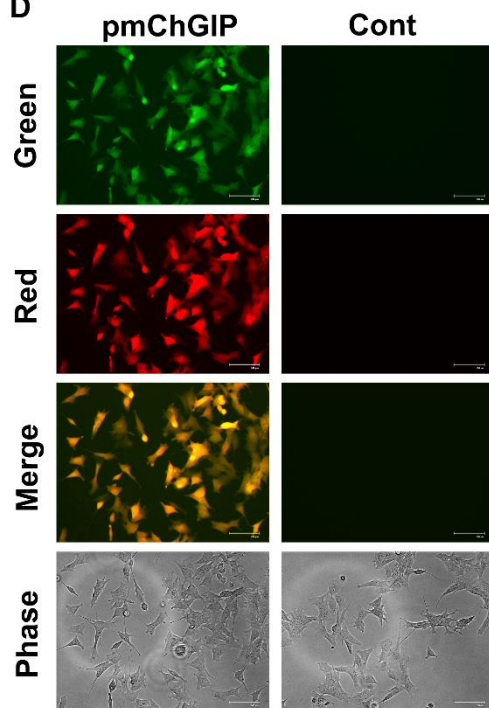**E**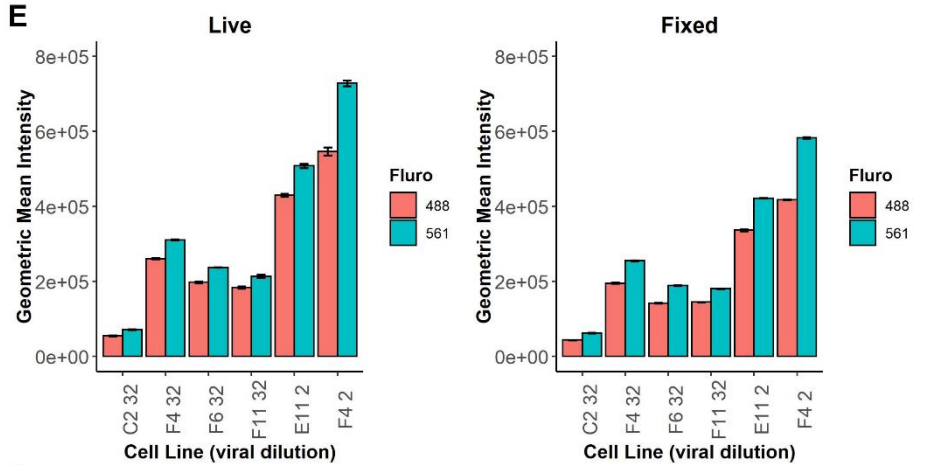**F**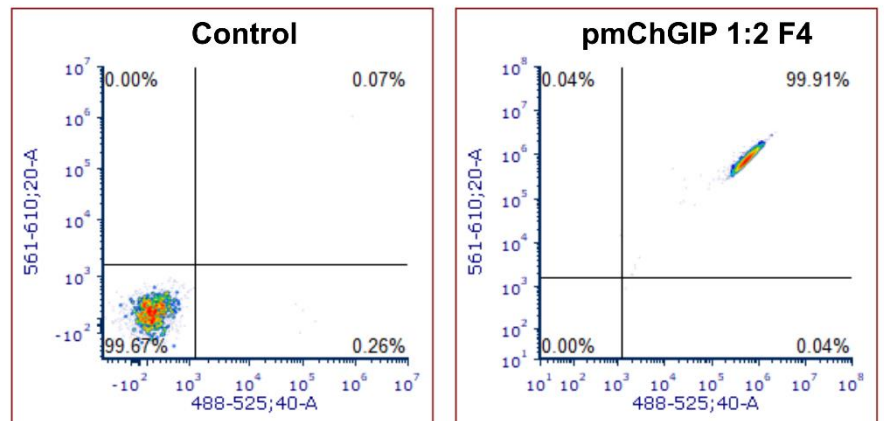

**Supplementary figure 2: Overlapping qPCR profiles of IMBN and ITGBN from two different institutes with different genetic backgrounds confirms reproducibility.** ddCT values for iPSC-microglia cultured in IMBN **A)** and ITGBN **B)** at both Oxford and Cambridge using different genetic backgrounds show a strong correlation in their expression profiles. ddCT values calculated against IGBN. (IMBN,  $R^2=0.236$ , p-value=0.03. ITGBN,  $R^2=0.348$ , p-value=0.006).

**A** IMBN qPCR Overlap ddCT to Haenseler et al 2017

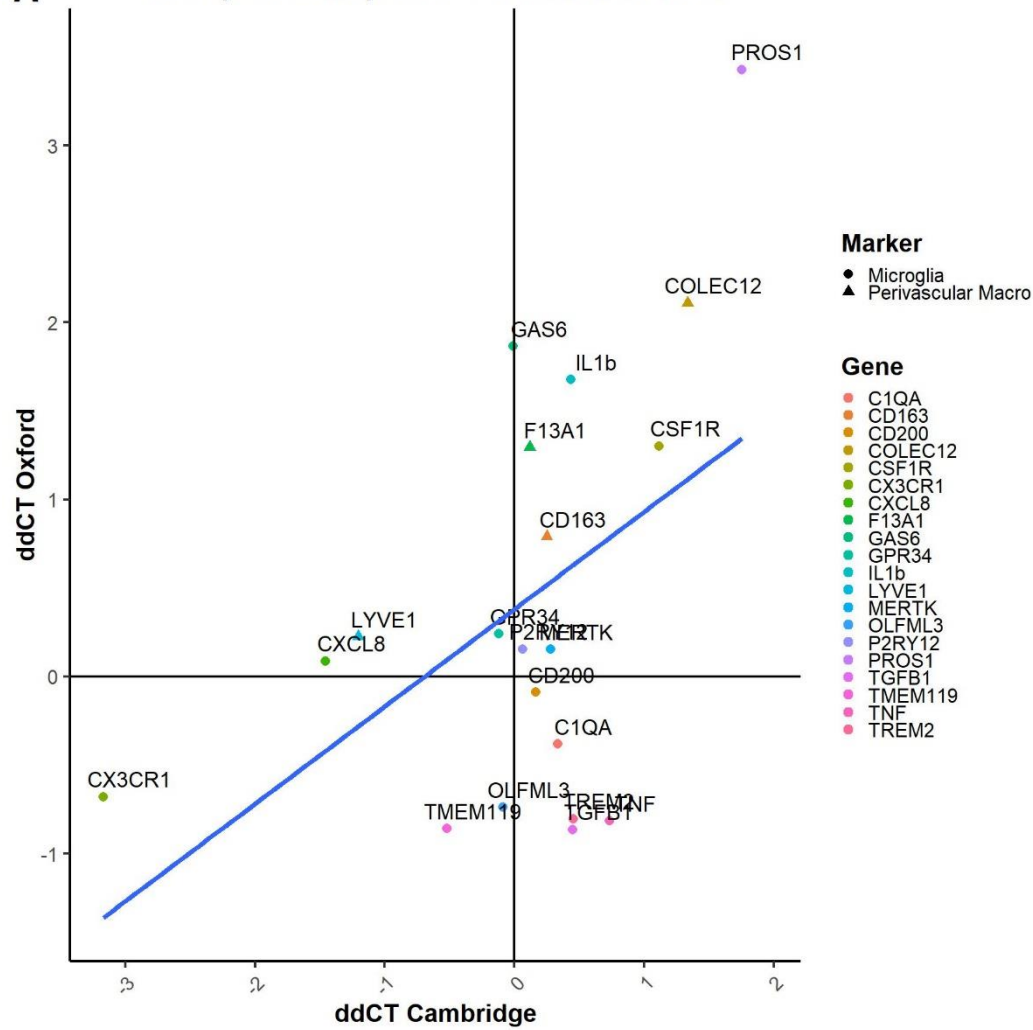

**B** ITGBN qPCR Overlap ddCT to Haenseler et al 2017

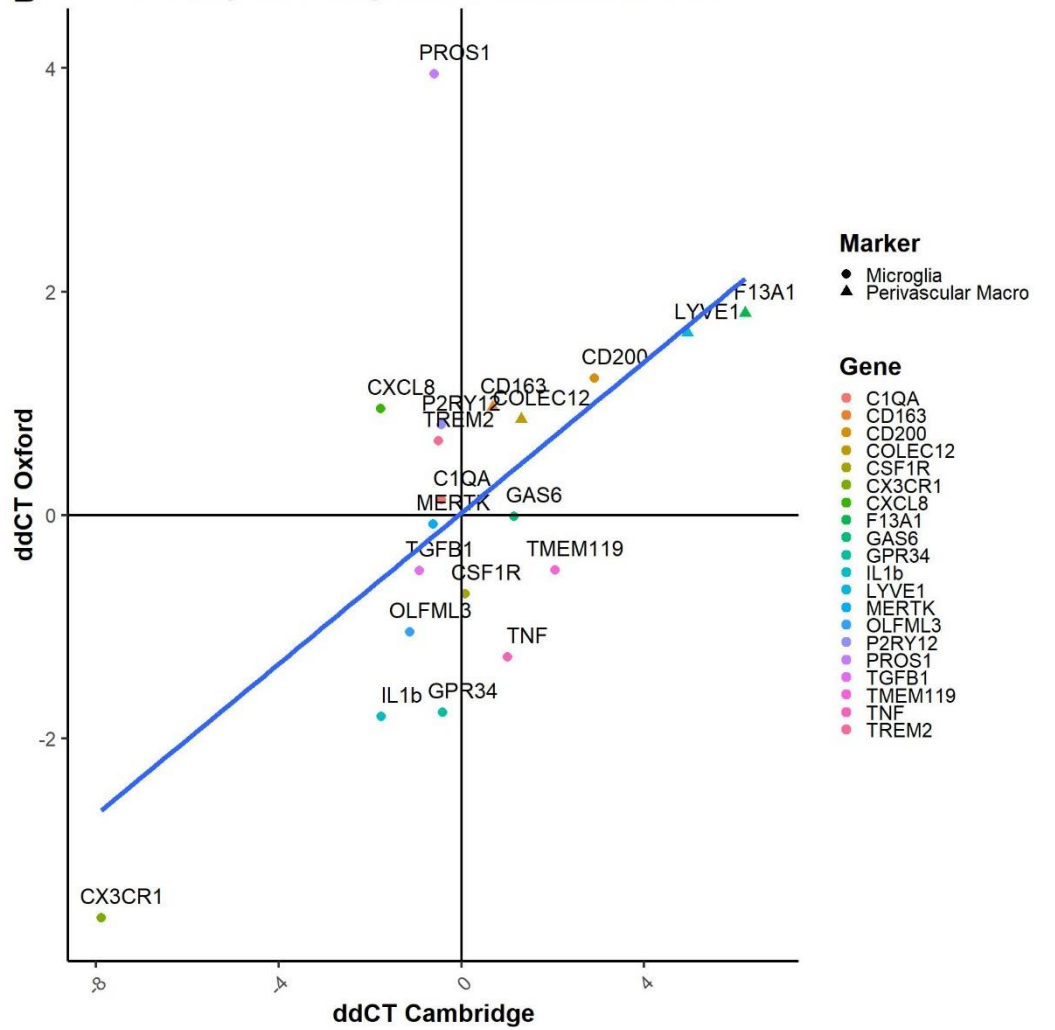

**Supplementary figure 3: Overlapping qPCR profiles of ITMG and ITM from two different institutes with different genetic backgrounds confirms reproducibility.**

ddCT values for iPSC-microglia cultured in ITMG **A)** and ITM ADMEM **B)** at both Oxford and Cambridge using different genetic backgrounds show a strong correlation in their expression profiles. ddCT values calculated against microglial precursors. (ITM,  $R^2=0.639$ , p-value= $2.36 \times 10^{-5}$ , ITMG,  $R^2=0.422$ , p-value=0.00195).

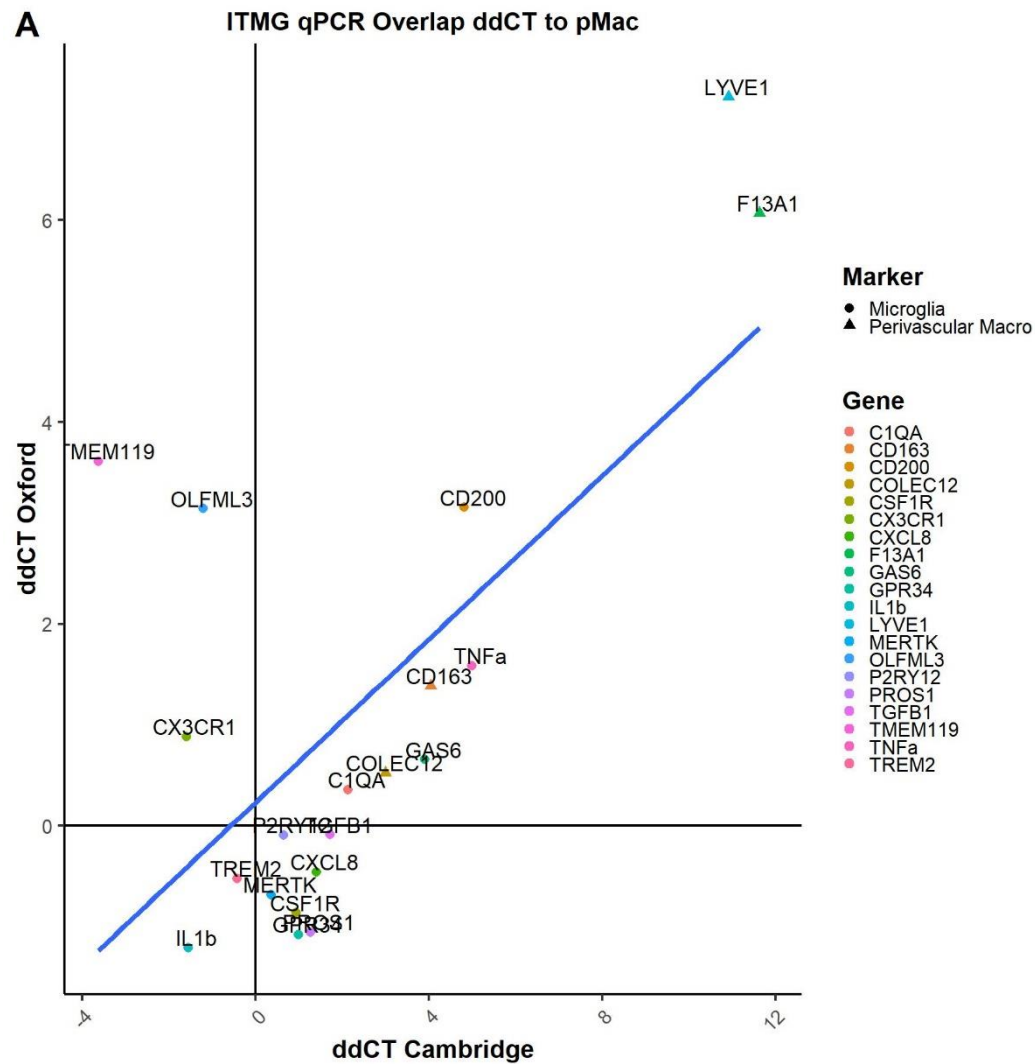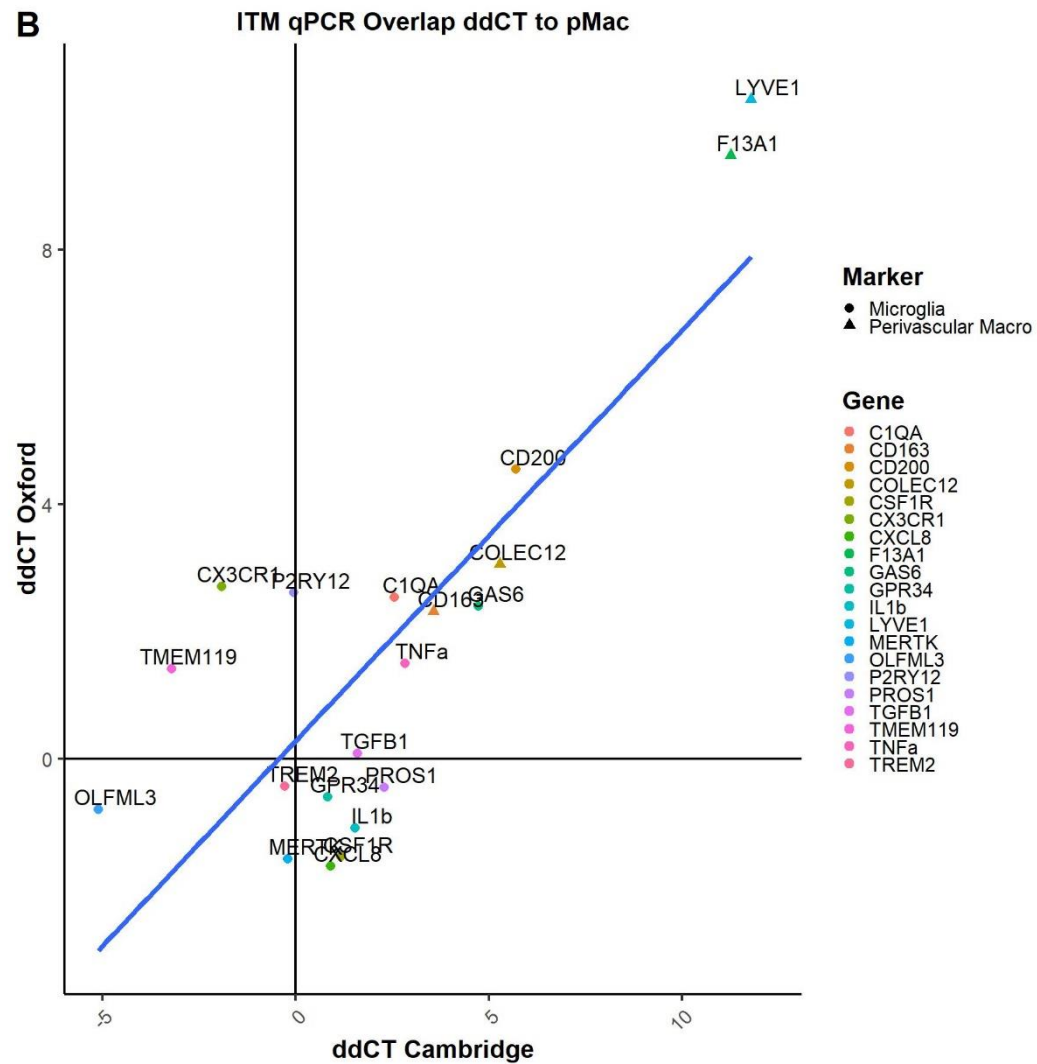

**Supplementary figure 4: Representative images of iPSC-microglia differentiated for 14d on three different genetic backgrounds (SFC841-03-01, SFC856-03-04, KOLF2.1S). Images taken at d14 at 10x magnification. Scale bar 100µm.**



**SFC856-03-04**

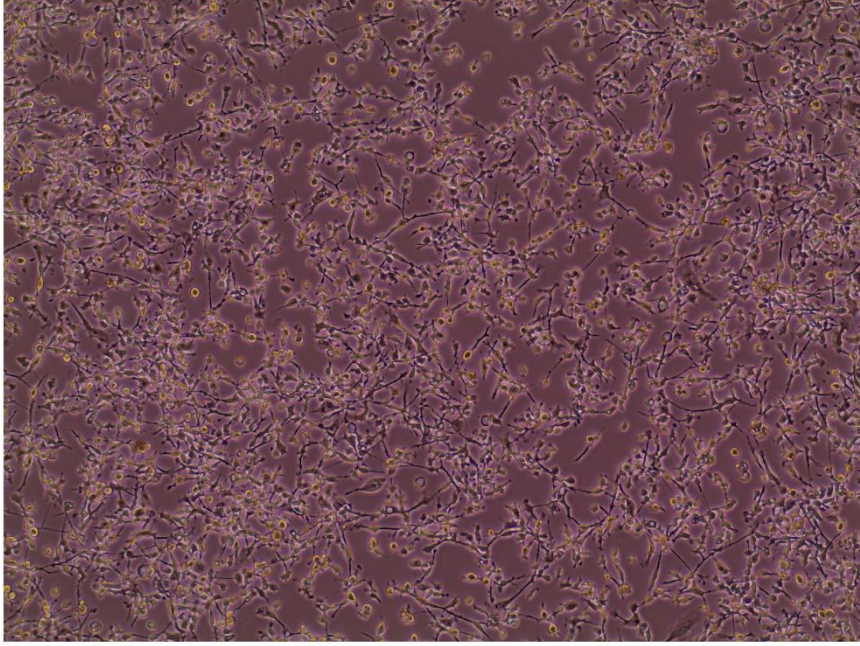

**SFC-841-03-01**

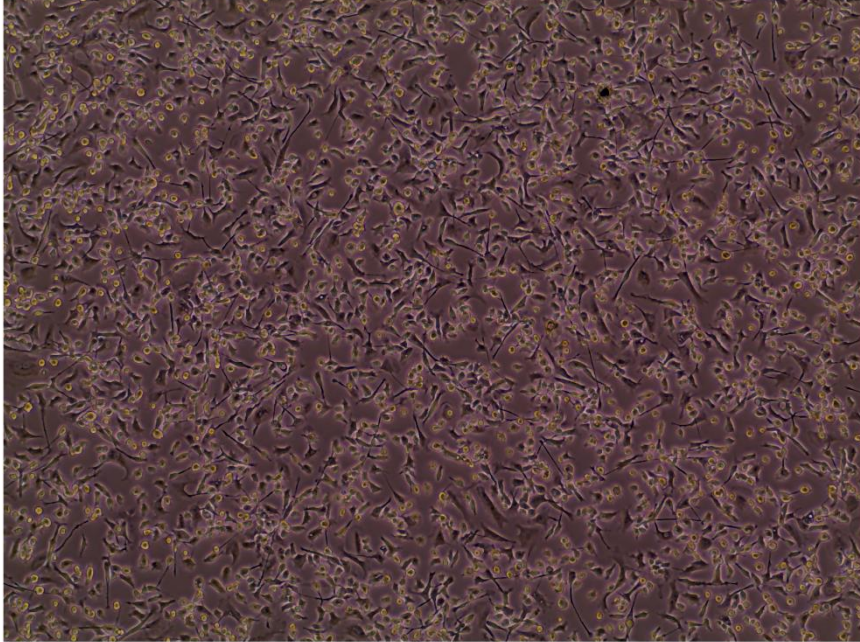

**KOLF2.1S**

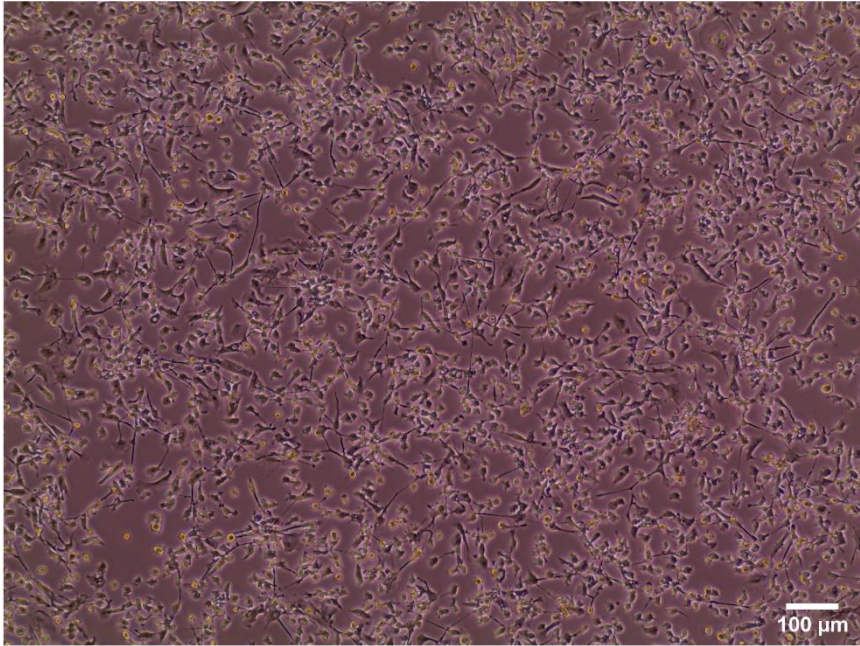

**Supplementary figure 5: Comparison of single cell RNA-seq analysis of six media to external data. A)** Principal component analysis (PCA) visualization of the six media samples from this manuscript (“Ours” after pseudobulk aggregation) compared to external bulk RNA-seq data (“Abud”, “Douvaras”, “Galatro”, “Mancuso”, “Muffat”), represented with different shapes. Cell types are highlighted with different colours: “exBrain”: ex vivo brain cortex tissue; “exDC”, ex vivo dendritic cells; “exMAC”, ex vivo macrophages; “exMGL”, ex vivo microglia; “exMonocyte”, ex vivo monocyte; “iMG”, iPSC-derived microglia; “iMG\_neuron”, iPSC-derived microglia co-cultured with neurons; “iNPC”, iPSC-derived neuronal progenitors; “iPSC”, induced pluripotent stem cells; “pAMGL”, primary adult microglia; “pAMGL”, pAMGL + serum; “pFMGL”, primary foetal microglia; “pMAC”, primary macrophages. A few sample points have been labelled directly for clarity. **B)** A highlighted version with only our samples and primary microglia colored (in red and black respectively).



**Supplementary figure 6: Single cell RNA-seq analysis of six media. A)** UMAP visualizations of cells coloured by clusters or inferred cell cycle phase (top), and principal component analysis (PCA) visualizations of cells coloured and split by media (bottom). **B)** UMAP visualizations of cells coloured by gene expression density of perivascular macrophage and microglial marker genes. **D)** Intersecting set plot of differentially expressed genes between ITGBN, IMBN, IM, ITMG and ITM ADMEM media against the IGBN baseline. Total differentially expressed genes per contrast in “Set Size”. **E)** UMAP visualizations of cells coloured by label transfer assignments per training data.



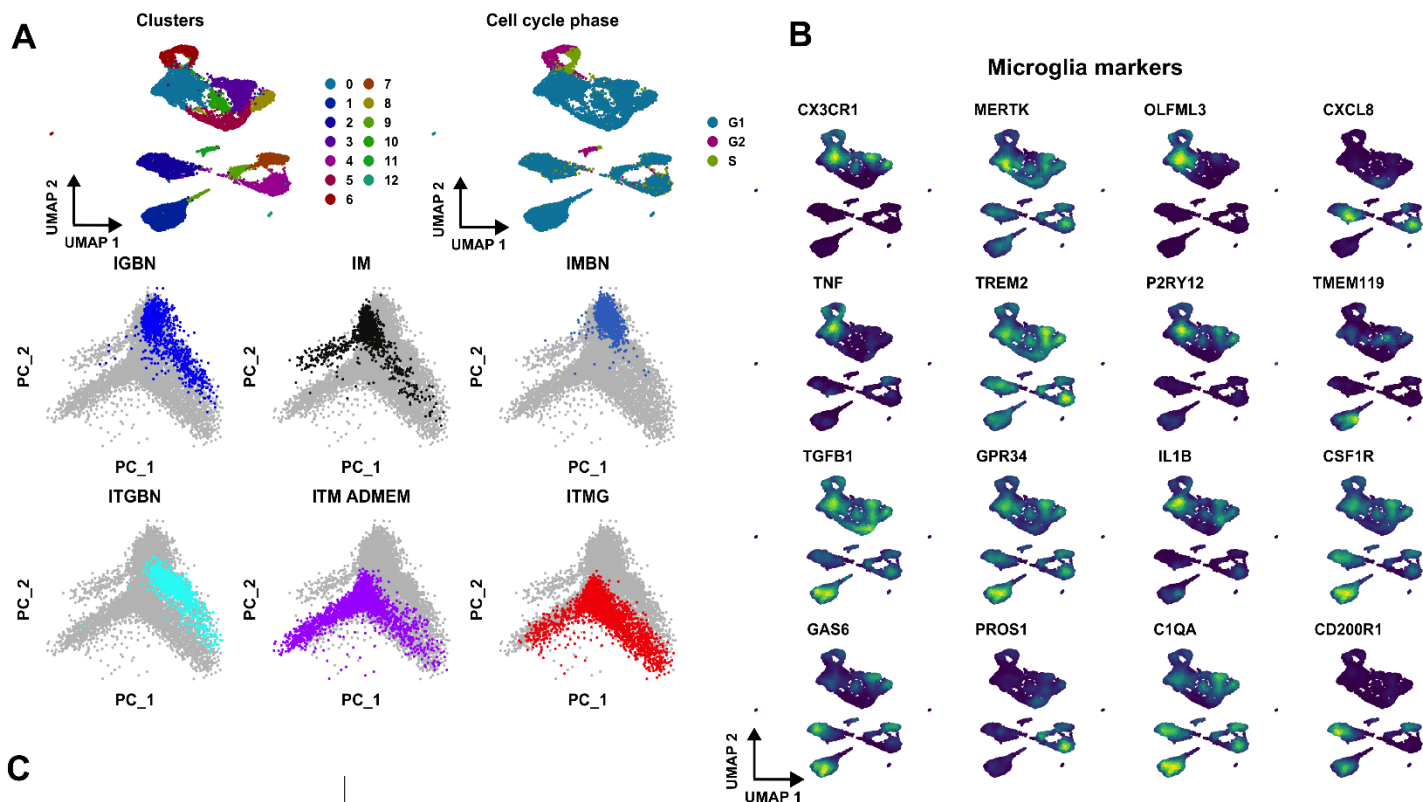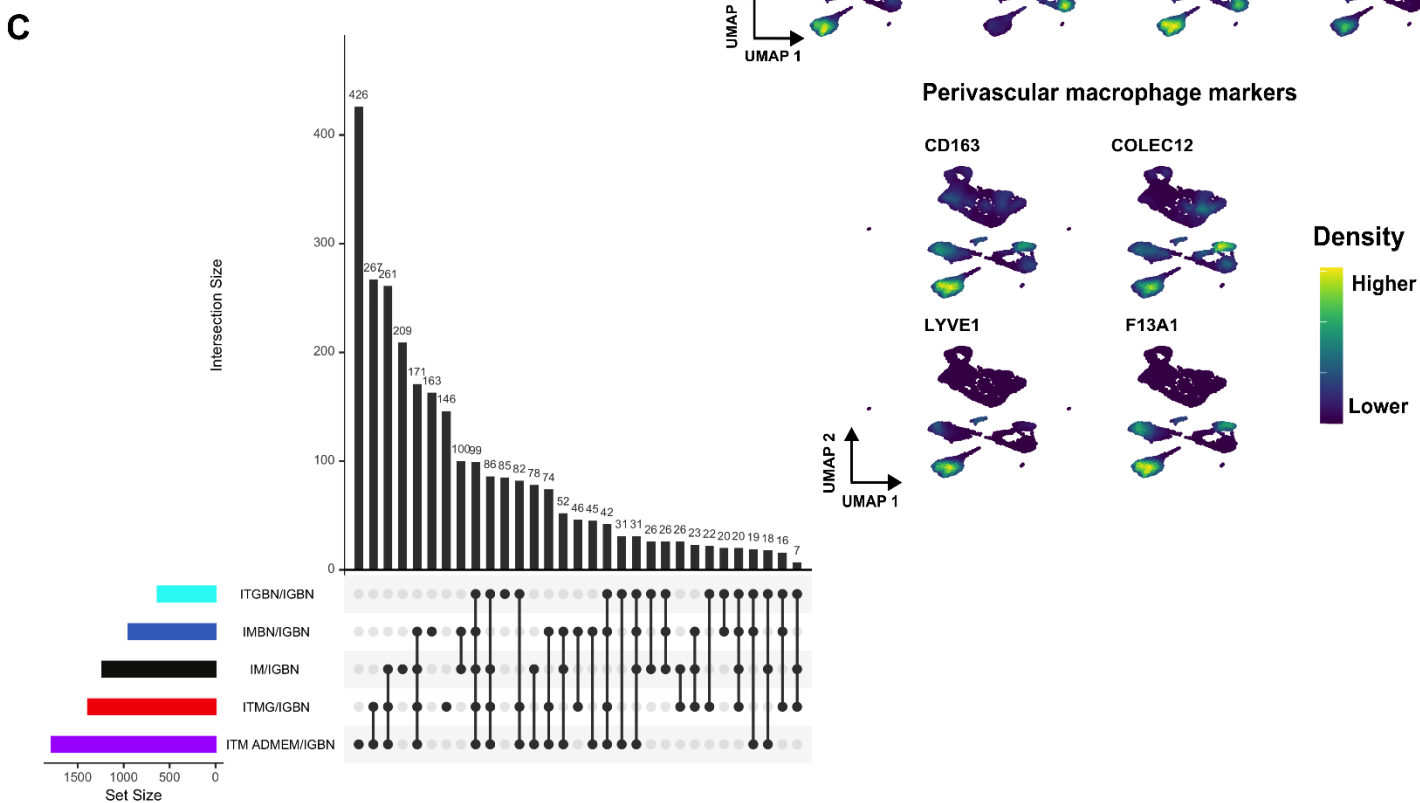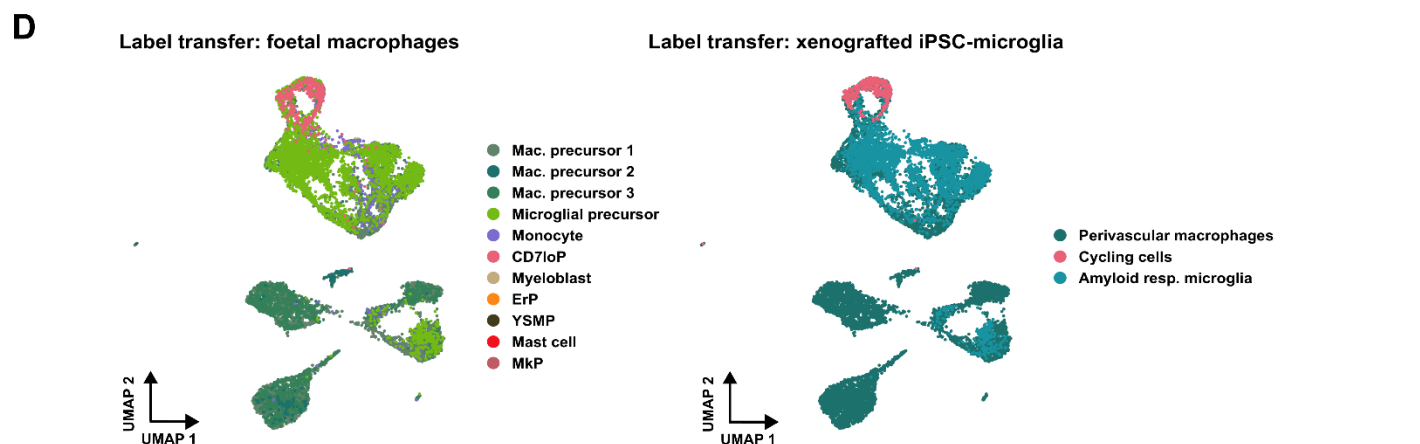

Supplement: MOESM1 [file 41598_2022_23477_MOESM1_ESM.pdf]
